# Supplementary material
Source: publisher figshare collection journal article supplement (https://frontiersin.figshare.com/ndownloader/files/28829445)
Supplement: Supplementary file [file 28829445]

## Supplementary material

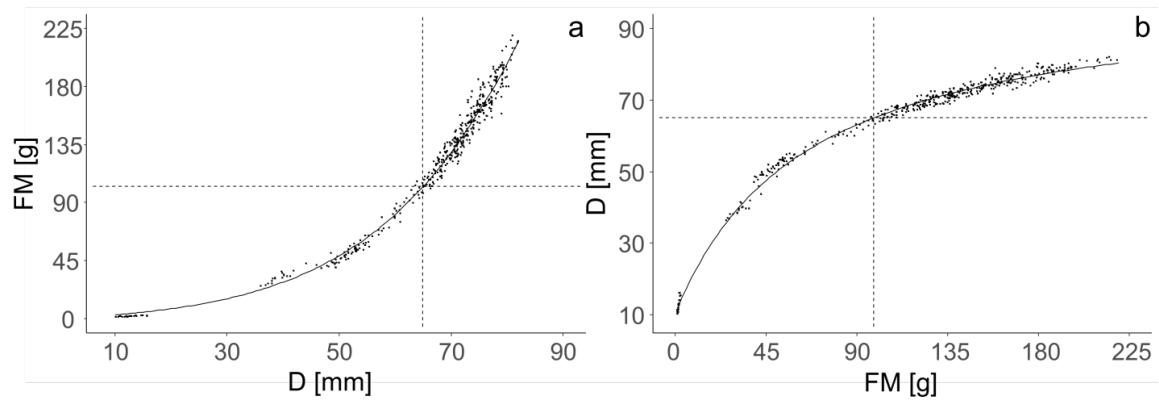

**Figure S1**

Allometric relationships between (a) diameter (D) and fresh mass (FM), (b) FM and D of developing 'Gala'/M.9 apple fruit ( $n = 460$ ) sampled at several dates during the growing seasons in 2018 and 2019 (Fig. 2). The vertical lines indicates the minimum fruit diameter for market entry of 65 mm, the solid lines regression models to convert D into FM and FM into D. ( $FM = 939.73 - 199741/((1.05202)^D + 211.527)$ ,  $R^2 = 0.98$ ;  $D = 10.465 + 90.45152 \times FM \times (64.614448 + FM)^{-1}$ ,  $R^2 = 0.99$ )

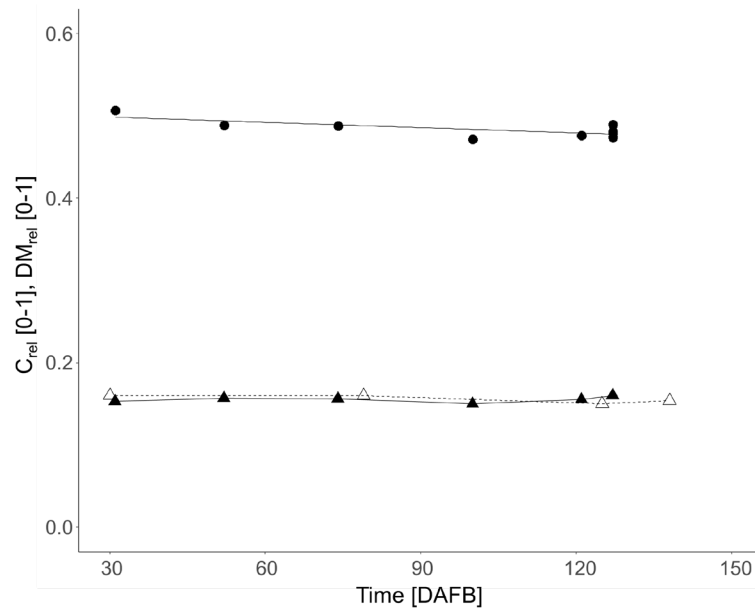

**Figure S2**

Time course in d after full bloom (DAFB) of average fraction of dry matter on fresh mass (triangles,  $DM_{rel}$ ) in 2018 (triangle pointing up), 2019 (triangle pointing down) and fractions of elemental C on  $DM_{rel}$  in 2018 (circle,  $C_{rel}$ ) of developing 'Brookfield Gala'/M.9 apple fruit. ( $C_{rel} = 50.837 - 0.0273 \times DAFB$ ,  $p=0.01$ ,  $R^2 = 0.72$ )

**Table S1**

Normalised equations of seasonal fruit development considering fresh mass ( $FM_{norm}$ ) and elemental C content ( $C_{norm}$ ) of ' Gala' apple fruit expressed over time in days after full bloom (DAFB) in two years.

| Year | Equations                                                    | No.  |
|------|--------------------------------------------------------------|------|
| 2018 | $FM_{norm} = 1.16 - \frac{193.1}{(1.056)^{DAFB} + 169.12}$   | S1.1 |
|      | $C_{norm} = 1.28 - \frac{132.83}{(1.0476)^{DAFB} + 103.39}$  | S2.1 |
| 2019 | $FM_{norm} = 1.04 - \frac{323.99}{(1.068)^{DAFB} + 312.55}$  | S1.2 |
|      | $C_{norm} = 1.06223 - \frac{189.26}{(1.06)^{DAFB} + 177.63}$ | S2.2 |

$$C_{rel}(DAFB) = 50.837 - 0.0273 \times DAFB, p=0.01, R^2 = 0.72 \quad (\text{Eq. S3})$$

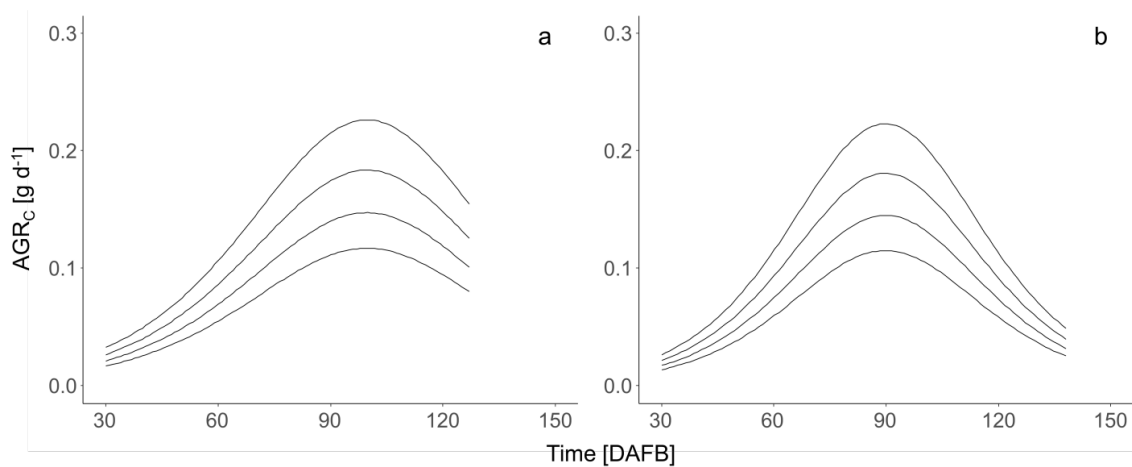**Figure S3**

Absolute growth rate in C content ( $AGR_C$ ) during 2018 (a) and 2019 (b) in the days after full bloom (DAFB) simulated for ' Gala'/M.9 apples with target fruit diameters of 65 mm, 70 mm, 75 mm and 80 mm (from the bottom to top).

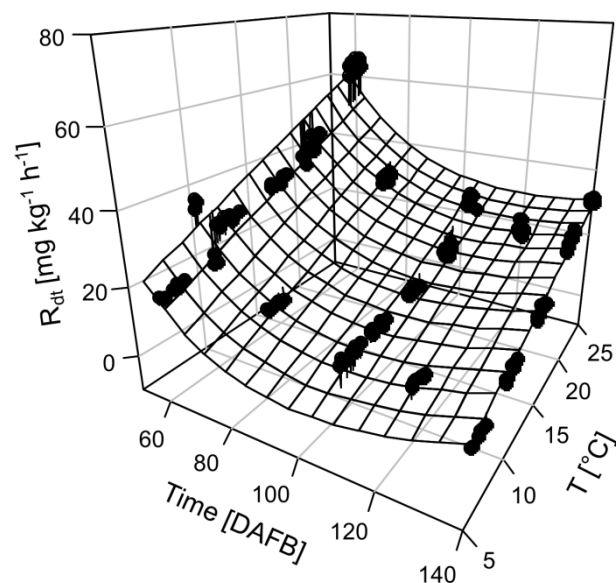

**Figure S4**

Fruit respiration rate,  $R_{dt}$ , of 'Gala' apple during cell expansion and ripening stage of fruit. The  $R_{dt}$  model considers the time, d after full bloom (DAFB), temperature (T):  $R_{dt} = 425.6 - 122.7 \times \ln(\text{DAFB}) - 0.0097 \times \text{DAFB} \times T + 2.31 \times T + 1.31 \times \text{DAFB}$ ,  $p < 0.001$ ;  $R^2 = 0.87$ .

**Table S2**

Fruit firmness, hue angle of 'Gala' apple fruit and percentage of fruit with >60 % red blush of the fruit surface of 'Gala' trees in two years measured at harvest.

| Year | $F_{\max}$ [N] <sup>1</sup> |      |      | hue angle <sup>1</sup> |      |      | Percentage of fruit with > 60 % red blush [%] <sup>2</sup> |      |      |
|------|-----------------------------|------|------|------------------------|------|------|------------------------------------------------------------|------|------|
|      | Min.                        | Max. | Mean | Min.                   | Max. | Mean | Min.                                                       | Max. | Mean |
| 2018 | 41                          | 98   | 67   | 22                     | 87   | 38   | 31                                                         | 99   | 82   |
| 2019 | 50                          | 115  | 86   | -                      | -    | -    | 44                                                         | 100  | 64   |

<sup>1</sup>individual fruit, 2018: n=180, 2019: n=1240; <sup>2</sup>individual trees, 2018: n=100, 2019: n=70

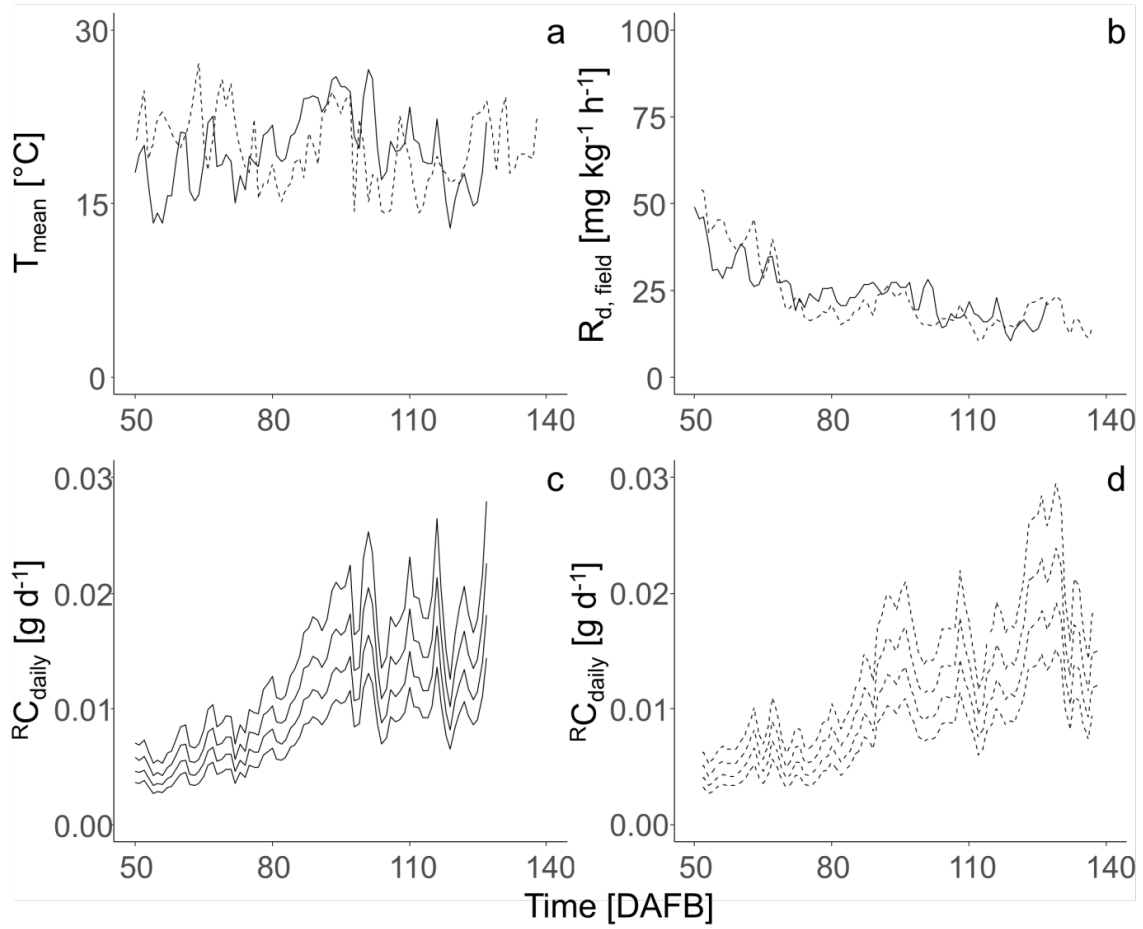

**Figure S5**

(a) Mean daily orchard temperature ( $T_{\text{mean}}$ ) in 2 m height, (b) temperature ( $T_{\text{mean}}$ )-corrected field-measured fruit respiration rate ( $R_{d, \text{field}}$ ; 2018: solid line, 2019: dashed line), (c, d) amount of C respired per fruit and day ( $R_{C, \text{daily}}$ ) of 'Gala'/M.9 apples with the target diameters of 65 mm, 70 mm, 75 mm and 80 mm (from the bottom up) during the days after full bloom (DAFB) in 2018 (c) and 2019 (d).
